# Supplementary material for: Anomalous electrochemical capacitance in Mott-insulator titanium sesquioxide
Source: Royal Society of Chemistry journal article supplement (doi:10.1039/d1ta10262a), 2022-01-01
Supplement: d1ta10262a1.pdf [file d1ta10262a1.pdf]

## Supporting information

### **Anomalous electrochemical capacitance in Mott-insulator titanium sesquioxide**

Sumana Kumar<sup>1†</sup>, Sukanta Nandi<sup>1†</sup>, Vikash Mishra<sup>2</sup>, Alok Shukla<sup>2</sup>, Abha Misra<sup>1‡</sup>

<sup>1</sup>Department of Instrumentation and Applied Physics, Indian Institute of Science, Bangalore, Karnataka 560012, India.

<sup>2</sup>Department of Physics, Indian Institute of Technology Bombay, Powai, Mumbai, Maharashtra 400076, India.

---

† Both the authors have contributed equally to this work.  
‡ Corresponding author.

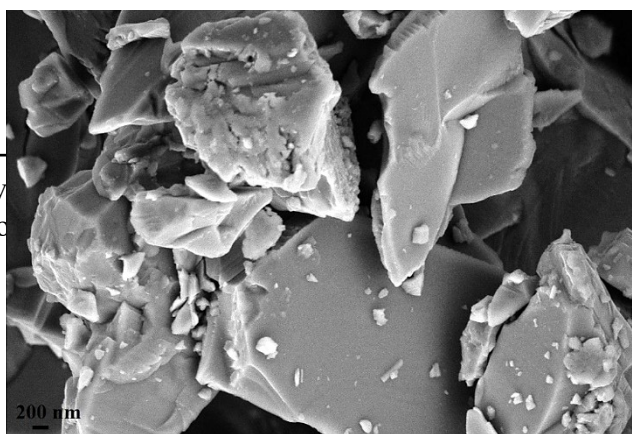

Figure S1. SEM image of as - purchased granular powder of  $\text{Ti}_2\text{O}_3$ .

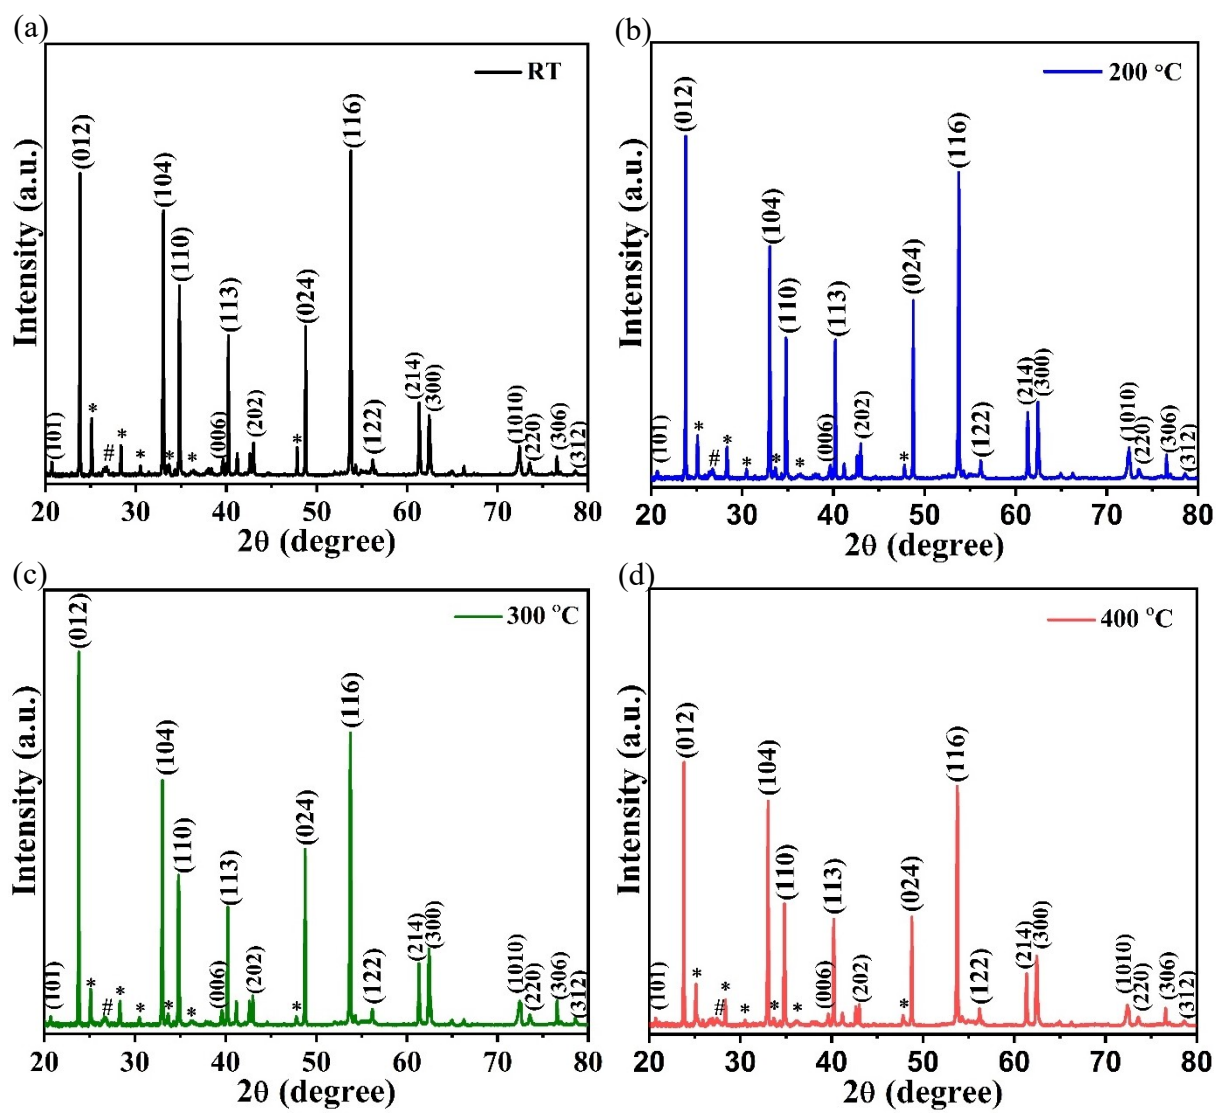

Figure S2. XRD spectra of (a) pristine  $\text{Ti}_2\text{O}_3$  and after annealing at (b) 200 °C, (c) 300 °C and (d) 400 °C.

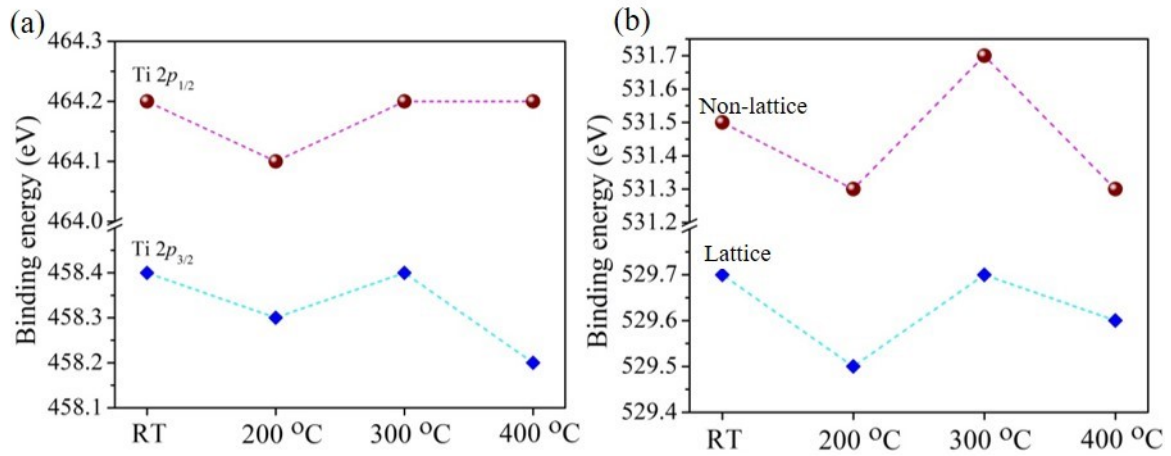

Figure S3. The change of binding energy for (a) Ti and (b) O as a function of the annealing temperature.

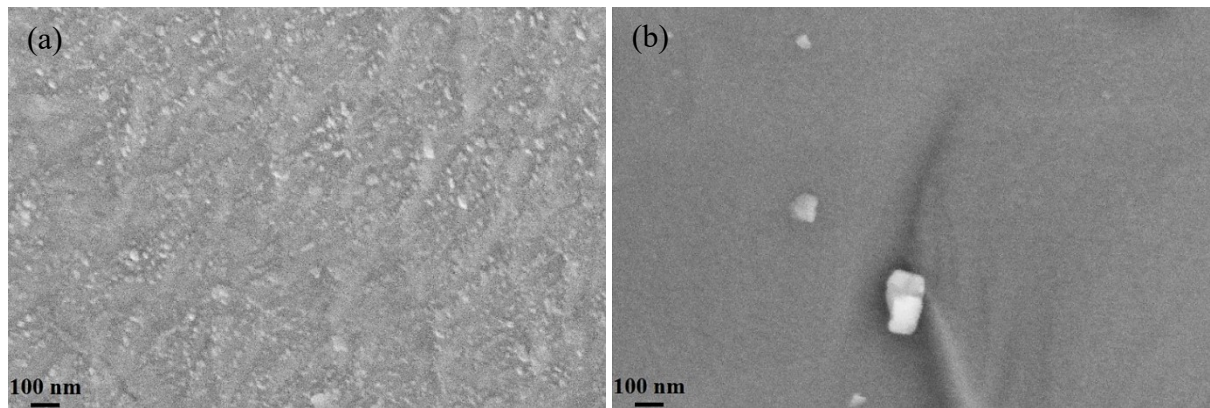

Figure S4. Surface morphology of  $\text{Ti}_2\text{O}_3$  annealed at (a) 200 °C and (b) 300 °C.

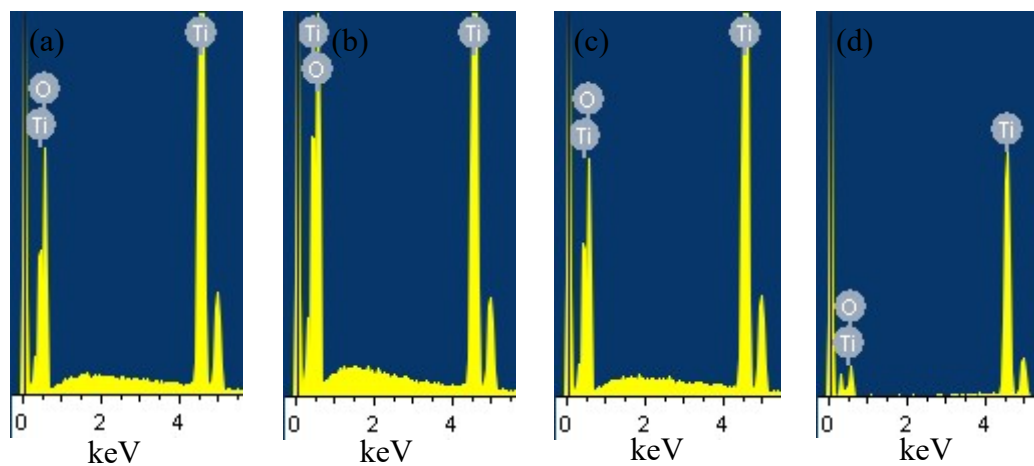

Figure S5. Energy dispersive X - ray analysis for the samples at (a) RT, annealed at (b) 200 °C, (c) 300 °C, and (d) 400 °C.

### **Theoretical Details:**

All the calculations have been performed within the framework of plane - wave density functional theory (PW - DFT), implemented in the Vienna ab - initio simulation package (VASP).[1,2] A very popular and reliable hybrid functional (i.e. Heyd - Scuseria - Ernzerhof (HSE06)) has been used in the present work, thereby making our results on the bandgap and other electronic properties quite accurate.[3] In these calculations mixing parameter ( $\alpha$ ) of 25% and a screening parameter of  $0.2 \text{ \AA}^{-1}$  have been used. To obtain the total charge density for orthorhombic  $\text{Ti}_2\text{O}_3$ , a Monkhorst - Pack scheme has been adopted for self - consistent - field (SCF) calculations employing a coarse grid composed of a  $7 \times 7 \times 7$  k - point mesh. All the calculations have been done with the experimental value of lattice constants.

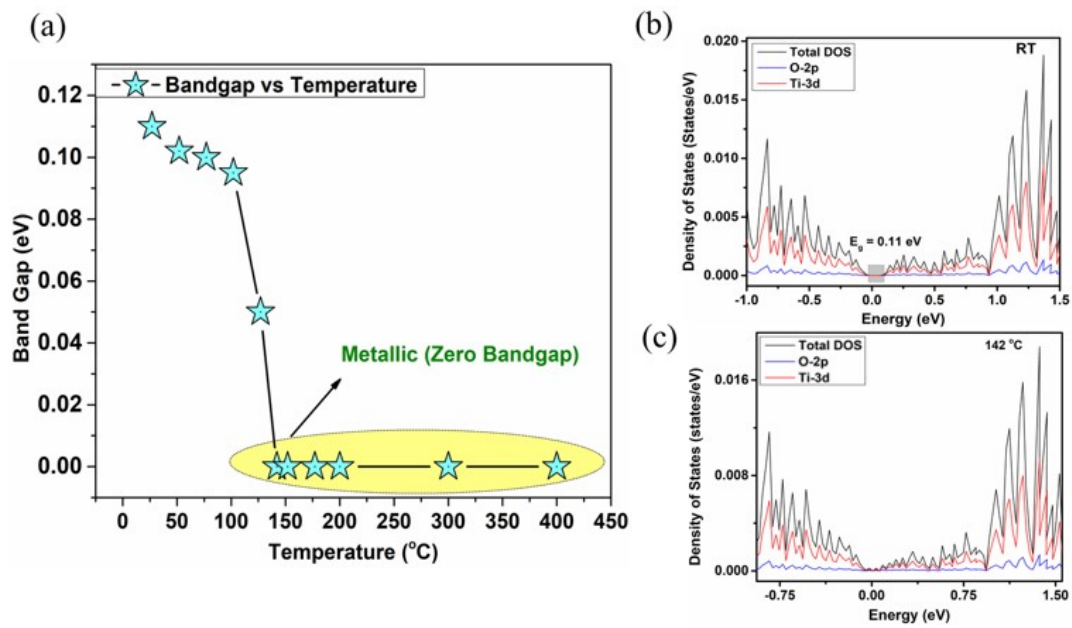

Figure S6. (a) Calculated band gap as a function of temperature exhibits a metallic-to-insulator transition around 142 °C. DOS of Ti and O along with TDOS at (b) RT and at (c) 142 °C

**Table- S1: Bader charge calculations of Ti atoms in Ti<sub>2</sub>O<sub>3</sub>**

| Atoms | RT    | 152 °C       | 77 °C        | 102 °C       | 127 °C       | 142 °C       | 152 °C       | 177 °C       | 200 °C       | 300 °C       | 400 °C       |
|-------|-------|--------------|--------------|--------------|--------------|--------------|--------------|--------------|--------------|--------------|--------------|
| Ti1   | 3.001 | <b>3.002</b> | <b>3.006</b> | <b>3.026</b> | <b>3.076</b> | <b>3.1</b>   | <b>3.113</b> | <b>3.212</b> | <b>3.245</b> | <b>3.259</b> | <b>3.296</b> |
| Ti2   | 3.002 | <b>3.004</b> | <b>3.008</b> | <b>3.008</b> | <b>3.088</b> | <b>3.131</b> | <b>3.167</b> | <b>3.234</b> | <b>3.267</b> | <b>3.302</b> | <b>3.375</b> |
| Ti3   | 3.001 | <b>3.006</b> | <b>3.011</b> | <b>3.011</b> | <b>3.112</b> | <b>3.116</b> | <b>3.167</b> | <b>3.271</b> | <b>3.298</b> | <b>3.312</b> | <b>3.412</b> |
| Ti4   | 3.001 | <b>3.002</b> | <b>3.012</b> | <b>3.052</b> | <b>3.125</b> | <b>3.265</b> | <b>3.298</b> | <b>3.321</b> | <b>3.356</b> | <b>3.378</b> | <b>3.432</b> |
| Ti5   | 3.003 | <b>3.003</b> | <b>3.045</b> | <b>3.085</b> | <b>3.155</b> | <b>3.378</b> | <b>3.388</b> | <b>3.412</b> | <b>3.423</b> | <b>3.444</b> | <b>3.464</b> |
| Ti6   | 3.001 | 3.004        | 3.01         | 3.01         | 3.01         | 3.003        | 3.001        | 3.002        | 3.004        | 3.005        | 3.001        |
| Ti7   | 3.002 | 3.006        | 3.009        | 3.009        | 3.001        | 3.002        | 3.001        | 3.004        | 3.003        | 3.005        | 3.002        |
| Ti8   | 3.001 | 3.005        | 3.002        | 3.012        | 3.011        | 3.006        | 3.004        | 3.005        | 3.006        | 3.002        | 3.001        |
| Ti9   | 3.003 | 3.009        | 3.005        | 3.015        | 3.009        | 3.005        | 3.005        | 3.007        | 3.005        | 3.004        | 3.003        |
| Ti10  | 3.001 | 3.003        | 3.007        | 3.017        | 3.005        | 3.005        | 3.006        | 3.002        | 3.001        | 3.004        | 3.004        |
| Ti11  | 3.002 | 3.003        | 3.006        | 3.016        | 3.003        | 3.001        | 3.001        | 3.005        | 3.002        | 3.005        | 3.006        |
| Ti12  | 3.004 | 3.004        | 3.01         | 3.01         | 3.01         | 3.004        | 3.006        | 3.008        | 3.007        | 3.006        | 3.007        |
| Ti13  | 3.001 | 3.008        | 3.004        | 3.014        | 3.014        | 3.006        | 3.011        | 3.012        | 3.011        | 3.01         | 3.003        |
| Ti14  | 3.002 | 3.006        | 3.003        | 3.013        | 3.013        | 3.014        | 3.013        | 3.025        | 3.02         | 3.019        | 3.014        |
| Ti15  | 3.001 | 3.008        | 3.005        | 3.015        | 3.015        | 3.009        | 3.012        | 3.014        | 3.016        | 3.012        | 3.017        |
| Ti16  | 3.004 | 3.004        | 3.007        | 3.017        | 3.017        | 3.004        | 3.009        | 3.011        | 3.008        | 3.005        | 3.012        |
| Ti17  | 3     | <b>3.002</b> | <b>3.048</b> | <b>3.098</b> | <b>3.118</b> | <b>3.153</b> | <b>3.184</b> | <b>3.21</b>  | <b>3.234</b> | <b>3.312</b> | <b>3.351</b> |
| Ti18  | 3.001 | <b>3.001</b> | <b>3.012</b> | <b>3.012</b> | <b>3.112</b> | <b>3.125</b> | <b>3.198</b> | <b>3.32</b>  | <b>3.334</b> | <b>3.342</b> | <b>3.41</b>  |
| Ti19  | 3.001 | <b>3.002</b> | <b>3.017</b> | <b>3.017</b> | <b>3.127</b> | <b>3.156</b> | <b>3.178</b> | <b>3.195</b> | <b>3.199</b> | <b>3.226</b> | <b>3.237</b> |
| Ti20  | 3.001 | <b>3.004</b> | <b>3.053</b> | <b>3.103</b> | <b>3.123</b> | <b>3.217</b> | <b>3.231</b> | <b>3.421</b> | <b>3.434</b> | <b>3.448</b> | <b>3.456</b> |
| Ti21  | 3.004 | <b>3.004</b> | <b>3.025</b> | <b>3.125</b> | <b>3.145</b> | <b>3.156</b> | <b>3.167</b> | <b>3.256</b> | <b>3.278</b> | <b>3.298</b> | <b>3.378</b> |
| Ti22  | 3.001 | 3.001        | 3.002        | 3.001        | 3.002        | 3.01         | 3.004        | 3.003        | 3.001        | 3.004        | 3.005        |
| Ti23  | 3.005 | 3.004        | 3.009        | 3.003        | 3.006        | 3.004        | 3.005        | 3.004        | 3.002        | 3.007        | 3.008        |
| Ti24  | 3.001 | 3.001        | 3.004        | 3.006        | 3.004        | 3.006        | 3.005        | 3.003        | 3.005        | 3.006        | 3.005        |
| Ti25  | 3.003 | 3.007        | 3.001        | 3.01         | 3.001        | 3.003        | 3.002        | 3.005        | 3.001        | 3.004        | 3.007        |
| Ti26  | 3.001 | 3.003        | 3.011        | 3.008        | 3.005        | 3.007        | 3.004        | 3.002        | 3.002        | 3.005        | 3.009        |
| Ti27  | 3.002 | 3.002        | 3.007        | 3.011        | 3.005        | 3.005        | 3.004        | 3.001        | 3.006        | 3.005        | 3.005        |
| Ti28  | 3.003 | 3.003        | 3.002        | 3.011        | 3.01         | 3.001        | 3.006        | 3.009        | 3.004        | 3.003        | 3.012        |
| Ti29  | 3.001 | 3.001        | 3.003        | 3.017        | 3.017        | 3.003        | 3.008        | 3.011        | 3.001        | 3.002        | 3.015        |
| Ti30  | 3.002 | 3.007        | 3.009        | 3.007        | 3.009        | 3.006        | 3.008        | 3.005        | 3.006        | 3.005        | 3.018        |
| Ti31  | 3.001 | 3.005        | 3.011        | 3.01         | 3.005        | 3.004        | 3.016        | 3.014        | 3.017        | 3.018        | 3.019        |
| Ti32  | 3.002 | 3.007        | 3.013        | 3.013        | 3.006        | 3.012        | 3.013        | 3.014        | 3.019        | 3.022        | 3.023        |

Bold letter with black colour represents the value of charge density of surface Ti – atoms, while bold letter with red colour represents the sharp increase in the value of charge density of surface Ti – atoms.

**Table- S2: Bader charge calculations of O atoms in Ti<sub>2</sub>O<sub>3</sub>**

| Atoms | RT    | 152 °C | 77 °C | 102 °C | 127 °C | 142 °C | 152 °C | 177 °C | 200 °C | 300 °C | 400 °C |
|-------|-------|--------|-------|--------|--------|--------|--------|--------|--------|--------|--------|
| O1    | 2.001 | 2.002  | 2.001 | 2.003  | 2.003  | 2.001  | 2.002  | 2.003  | 2.003  | 2.002  | 2.004  |
| O2    | 2.003 | 2.007  | 2.006 | 2.005  | 2.009  | 2.002  | 2.007  | 2.003  | 2.005  | 2.003  | 2.003  |
| O3    | 2.005 | 2.003  | 2.001 | 2.002  | 2.003  | 2.005  | 2.003  | 2.004  | 2.005  | 2.003  | 2.005  |
| O4    | 2.001 | 2.001  | 2.002 | 2.001  | 2.002  | 2.005  | 2.001  | 2.011  | 2.001  | 2.002  | 2.01   |
| O5    | 2.001 | 2.001  | 2.004 | 2.004  | 2.007  | 2.003  | 2.001  | 2.003  | 2.007  | 2.001  | 2.002  |
| O6    | 2.001 | 2.004  | 2.003 | 2.005  | 2.003  | 2.006  | 2.004  | 2.003  | 2.005  | 2.003  | 2.013  |
| O7    | 2.001 | 2.001  | 2.002 | 2.004  | 2.006  | 2.004  | 2.001  | 2.002  | 2.009  | 2.001  | 2.008  |
| O8    | 2.001 | 2.003  | 2.001 | 2.004  | 2.008  | 2.003  | 2.003  | 2.005  | 2.004  | 2.003  | 2.008  |
| O9    | 2.002 | 2.002  | 2.003 | 2.006  | 2.003  | 2.003  | 2.002  | 2.001  | 2.001  | 2.002  | 2.005  |
| O10   | 2.002 | 2.006  | 2.005 | 2.003  | 2.007  | 2.005  | 2.006  | 2.004  | 2.003  | 2.005  | 2.006  |
| O11   | 2.001 | 2.001  | 2.003 | 2.001  | 2.005  | 2.002  | 2.001  | 2.006  | 2.006  | 2.001  | 2.004  |
| O12   | 2.001 | 2.008  | 2.006 | 2.002  | 2.004  | 2.002  | 2.008  | 2.003  | 2.002  | 2.008  | 2.003  |
| O13   | 2.001 | 2.002  | 2.003 | 2.006  | 2.007  | 2.005  | 2.002  | 2.003  | 2.006  | 2.002  | 2.001  |
| O14   | 2.002 | 2.003  | 2.004 | 2.005  | 2.004  | 2.004  | 2.003  | 2.004  | 2.004  | 2.003  | 2.004  |
| O15   | 2.001 | 2.003  | 2.005 | 2.002  | 2.007  | 2.002  | 2.003  | 2.006  | 2.006  | 2.006  | 2.008  |
| O16   | 2.002 | 2.003  | 2.006 | 2.004  | 2.004  | 2.004  | 2.003  | 2.002  | 2.007  | 2.003  | 2.002  |
| O17   | 2     | 2.002  | 2.003 | 2.006  | 2.008  | 2.005  | 2.002  | 2.001  | 2.009  | 2.002  | 2.002  |
| O18   | 2.001 | 2.003  | 2.002 | 2.006  | 2.004  | 2.004  | 2.003  | 2.002  | 2.003  | 2.007  | 2.002  |
| O19   | 2.003 | 2.004  | 2.003 | 2.004  | 2.005  | 2.005  | 2.004  | 2.003  | 2.002  | 2.004  | 2.006  |
| O20   | 2.001 | 2.002  | 2     | 2.003  | 2.003  | 2.001  | 2.002  | 2.004  | 2.003  | 2.002  | 2.004  |
| O21   | 2     | 2.002  | 2.003 | 2.005  | 2.008  | 2.006  | 2.002  | 2.003  | 2.006  | 2.002  | 2.005  |
| O22   | 2.002 | 2.004  | 2.005 | 2.006  | 2.003  | 2.008  | 2.004  | 2.001  | 2.006  | 2.004  | 2.001  |
| O23   | 2.001 | 2.005  | 2.003 | 2.005  | 2.007  | 2.004  | 2.005  | 2.004  | 2.004  | 2.005  | 2.005  |
| O24   | 2.001 | 2.005  | 2.002 | 2.007  | 2.008  | 2.005  | 2.005  | 2.003  | 2.006  | 2.005  | 2.003  |
| O25   | 2.002 | 2.003  | 2.006 | 2.002  | 2.004  | 2.003  | 2.003  | 2.005  | 2.002  | 2.003  | 2.005  |
| O26   | 2.002 | 2.004  | 2.003 | 2.006  | 2.007  | 2.006  | 2.004  | 2.003  | 2.005  | 2.005  | 2.004  |
| O27   | 2.001 | 2.005  | 2.003 | 2.005  | 2.006  | 2.005  | 2.005  | 2.003  | 2.005  | 2.005  | 2.01   |
| O28   | 2.002 | 2.001  | 2.005 | 2.005  | 2.004  | 2.004  | 2.001  | 2.001  | 2.008  | 2.001  | 2.001  |
| O29   | 2.001 | 2.003  | 2.002 | 2.002  | 2.004  | 2.008  | 2.003  | 2.005  | 2.002  | 2.001  | 2.016  |
| O30   | 2.003 | 2.004  | 2.005 | 2.008  | 2.007  | 2.005  | 2.004  | 2.003  | 2.005  | 2.004  | 2.003  |
| O31   | 2.001 | 2.006  | 2.003 | 2.005  | 2.009  | 2.002  | 2.006  | 2.002  | 2.005  | 2.006  | 2.011  |

|     |       |       |       |       |       |       |       |       |       |       |       |
|-----|-------|-------|-------|-------|-------|-------|-------|-------|-------|-------|-------|
| O32 | 2.002 | 2.004 | 2.007 | 2.002 | 2.003 | 2.002 | 2.004 | 2.003 | 2.003 | 2.007 | 2.003 |
| O33 | 2.002 | 2.003 | 2.004 | 2.009 | 2.002 | 2.003 | 2.003 | 2.004 | 2.007 | 2.003 | 2.012 |
| O34 | 2.001 | 2.002 | 2.001 | 2.008 | 2.008 | 2.007 | 2.002 | 2.005 | 2.005 | 2.002 | 2.005 |
| O35 | 2.002 | 2.003 | 2.007 | 2.007 | 2.001 | 2.007 | 2.003 | 2.002 | 2.007 | 2.006 | 2.003 |
| O36 | 2.001 | 2.001 | 2.004 | 2.002 | 2.009 | 2.003 | 2.001 | 2.004 | 2.002 | 2.001 | 2.004 |
| O37 | 2.003 | 2.005 | 2.002 | 2.004 | 2.004 | 2.003 | 2.005 | 2.001 | 2.005 | 2.001 | 2.005 |
| O38 | 2.001 | 2.003 | 2.005 | 2.001 | 2.006 | 2.004 | 2.003 | 2.005 | 2.001 | 2.003 | 2.005 |
| O39 | 2.001 | 2.005 | 2.006 | 2.002 | 2.004 | 2.001 | 2.005 | 2.004 | 2.002 | 2.002 | 2.005 |
| O40 | 2.004 | 2.005 | 2.003 | 2.004 | 2.007 | 2.009 | 2.005 | 2.003 | 2.007 | 2.005 | 2.003 |
| O41 | 2.005 | 2.002 | 2.001 | 2.005 | 2.001 | 2.006 | 2.002 | 2.003 | 2.005 | 2.002 | 2.006 |
| O42 | 2.001 | 2.003 | 2.007 | 2.007 | 2.005 | 2.006 | 2.003 | 2.002 | 2.003 | 2.001 | 2.002 |
| O43 | 2.006 | 2.007 | 2.004 | 2.008 | 2.008 | 2.008 | 2.007 | 2.002 | 2.003 | 2.007 | 2.002 |
| O44 | 2.001 | 2.002 | 2.006 | 2.006 | 2.006 | 2.008 | 2.002 | 2.003 | 2.005 | 2.012 | 2.003 |
| O45 | 2.001 | 2.003 | 2.005 | 2.002 | 2.005 | 2.001 | 2.003 | 2.001 | 2.002 | 2.003 | 2.008 |
| O46 | 2.002 | 2.004 | 2.002 | 2.007 | 2.003 | 2.008 | 2.004 | 2.001 | 2.004 | 2.001 | 2.001 |
| O47 | 2.004 | 2.005 | 2.003 | 2.006 | 2.006 | 2.005 | 2.005 | 2.005 | 2.008 | 2.015 | 2.004 |
| O48 | 2.006 | 2.007 | 2.002 | 2.008 | 2.009 | 2.006 | 2.006 | 2.003 | 2.006 | 2.007 | 2.005 |

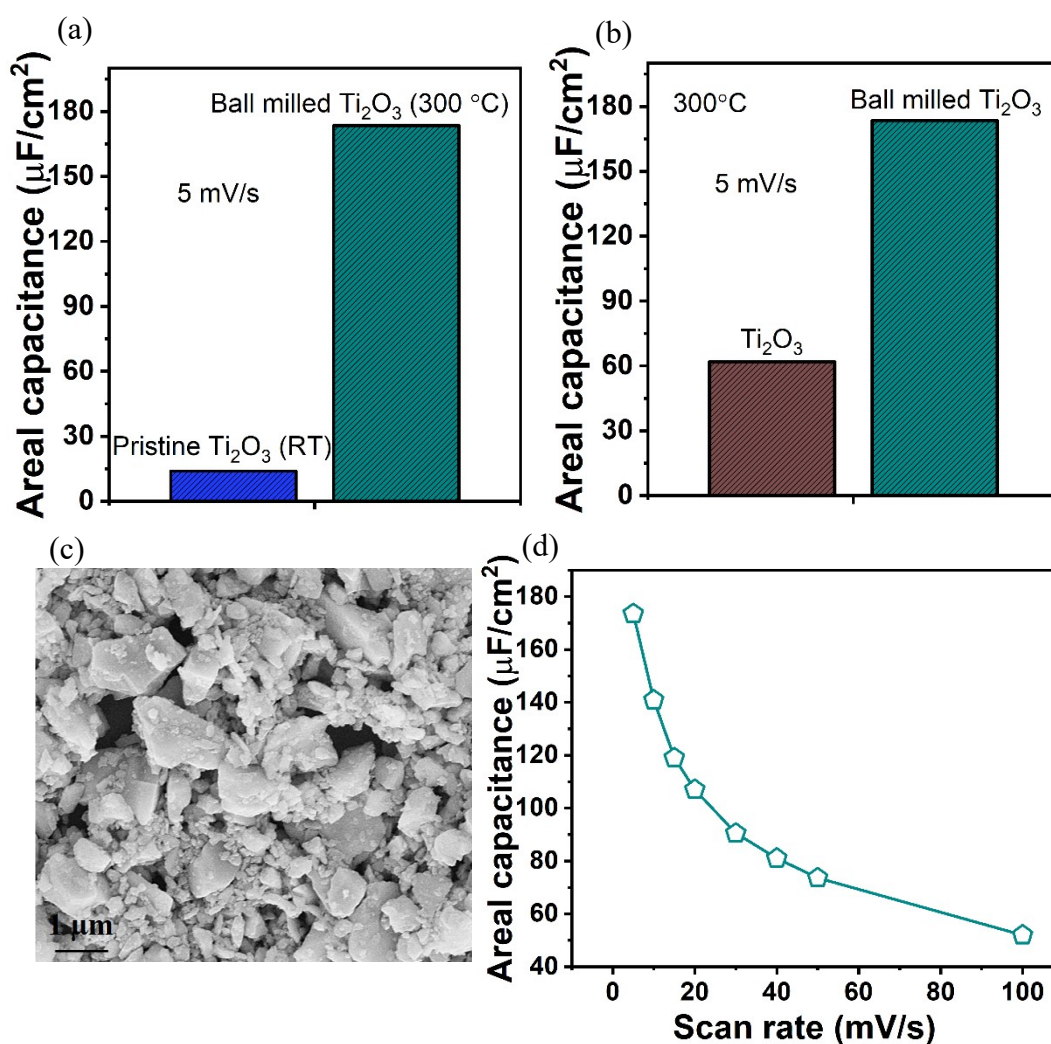



Figure S7. (a) Areal capacitance comparison between pristine  $\text{Ti}_2\text{O}_3$  and ball - milled  $\text{Ti}_2\text{O}_3$  devices annealed at  $300^\circ\text{C}$  at  $5\text{ mV/s}$  scan rate extracted from CV curve. (b) Areal capacitance comparison between  $\text{Ti}_2\text{O}_3$  and ball - milled  $\text{Ti}_2\text{O}_3$  devices, both annealed at  $300^\circ\text{C}$  at  $5\text{ mV/s}$  scan rate extracted from CV curve. (c) SEM image of ball-milled  $\text{Ti}_2\text{O}_3$ . (d) Areal capacitance plotted against scan rates of the ball - milled  $\text{Ti}_2\text{O}_3$  device annealed at  $300^\circ\text{C}$ .

**Ball-milling condition:** Bill-milling of granular  $\text{Ti}_2\text{O}_3$  performed at  $300\text{ rpm}$  for  $12\text{ h}$  in the ethanol solution.

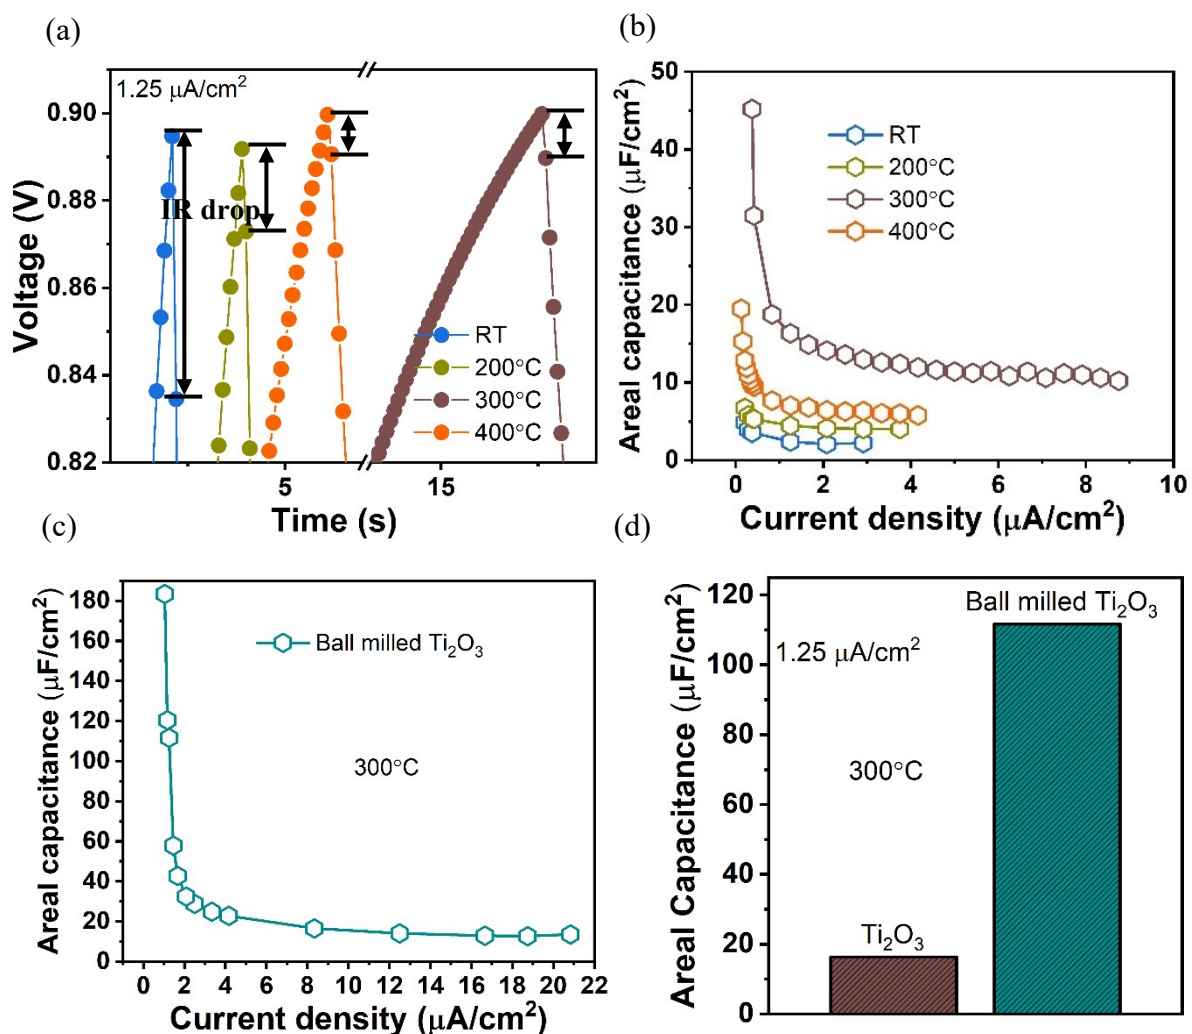

Figure S8. (a) IR drop or voltage drop at the beginning of the discharge curve at  $1.25 \mu\text{A}/\text{cm}^2$  applied current density of all the  $\text{Ti}_2\text{O}_3$  devices obtained from the charge - discharge curve. (b) Areal capacitance plotted against current densities for all the  $\text{Ti}_2\text{O}_3$  devices extracted from the charge - discharge curve. (c) Areal capacitance plotted against current densities for ball - milled  $\text{Ti}_2\text{O}_3$  device annealed at  $300^\circ\text{C}$ . (d) Areal capacitance comparison of  $\text{Ti}_2\text{O}_3$  and ball - milled  $\text{Ti}_2\text{O}_3$  devices both annealed at  $300^\circ\text{C}$  at  $1.25 \mu\text{A}/\text{cm}^2$  current density.

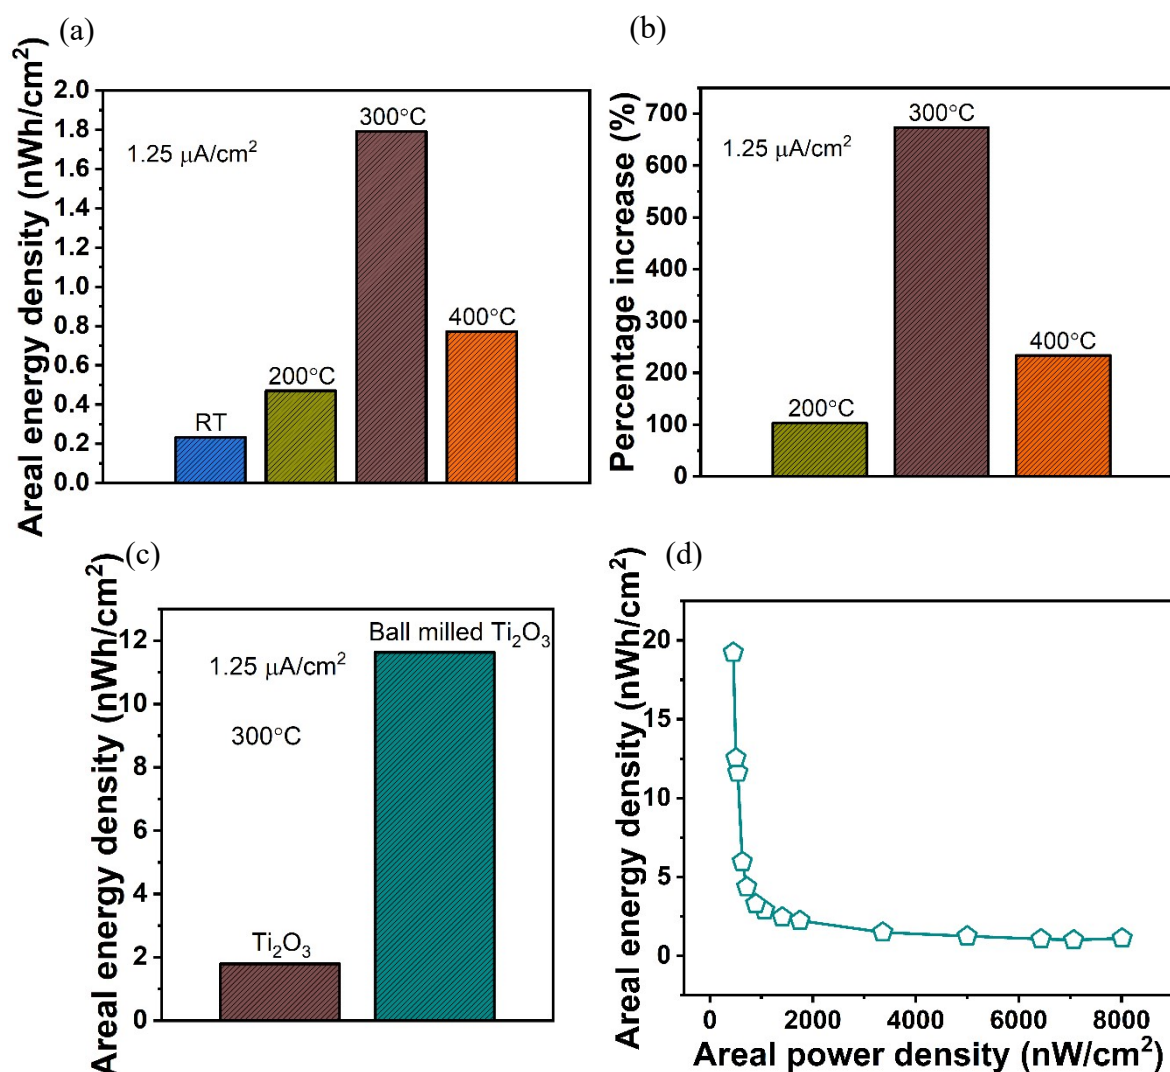

Figure S9. (a) Areal energy density of all the  $\text{Ti}_2\text{O}_3$  devices compared at a current density of  $1.25 \mu\text{A}/\text{cm}^2$ . (b) Percentage increase in the energy density of the  $\text{Ti}_2\text{O}_3$  devices annealed at

different temperatures with respect to pristine  $\text{Ti}_2\text{O}_3$  device. (c) Areal energy density comparison of the  $\text{Ti}_2\text{O}_3$  and ball-milled  $\text{Ti}_2\text{O}_3$  devices both annealed at  $300\text{ }^\circ\text{C}$  at a current density of  $1.25\text{ }\mu\text{A}/\text{cm}^2$ . (d) Areal energy density plotted against areal power density of the ball-milled  $\text{Ti}_2\text{O}_3$  device annealed at  $300\text{ }^\circ\text{C}$ .

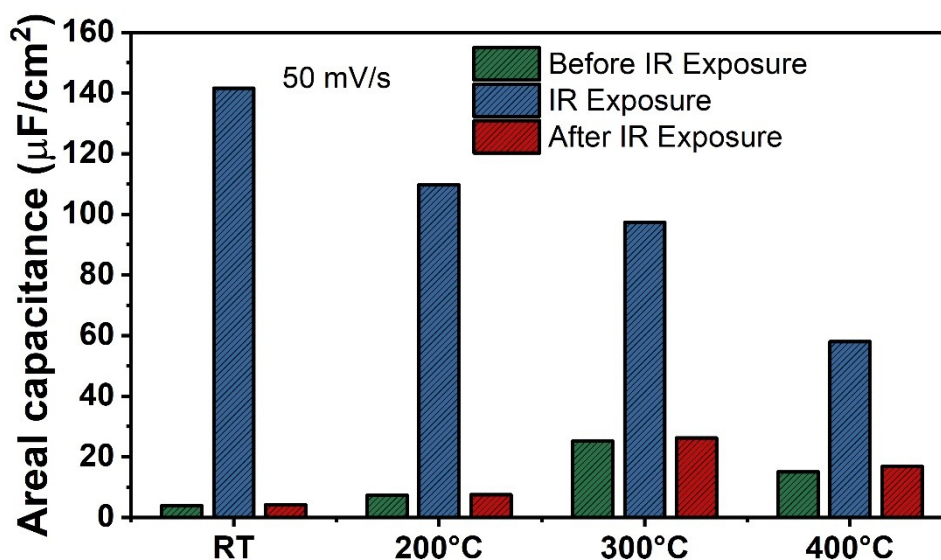

Figure S10. Areal capacitance comparison of  $\text{Ti}_2\text{O}_3$  device annealed at different temperature including pristine one, upon IR exposure at three conditions before, at saturation and after exposure.

**Electrode preparation for three-electrode measurements:** The working electrode was prepared by adding 90 wt% of ball-milled  $\text{Ti}_2\text{O}_3$  powder (annealed at  $300\text{ }^\circ\text{C}$ ) in ethanol solvent (10 ml) followed by 4h of sonication. After that 10 wt% of Polyvinylidene fluoride (PVDF) was added to the solution and stirred for 6h. The homogeneous mixture was spray-coated on a cleaned stainless steel substrate using argon gas at  $120\text{ }^\circ\text{C}$ . The material-coated electrode was dried at  $80\text{ }^\circ\text{C}$  for 12h and area of the electrode was  $\sim 1 \times 2.5\text{ cm}^2$  with a mass loading of  $1.5\text{ mg}/\text{cm}^2$ . The capacitance measurements were done using  $1\text{M H}_3\text{PO}_4$  aqueous solution as the electrolyte in a three-electrode cell, containing a Pt wire as a counter electrode, a saturated

Ag/AgCl electrode as a reference electrode, and the as-prepared material-coated stainless steel as the working electrode.

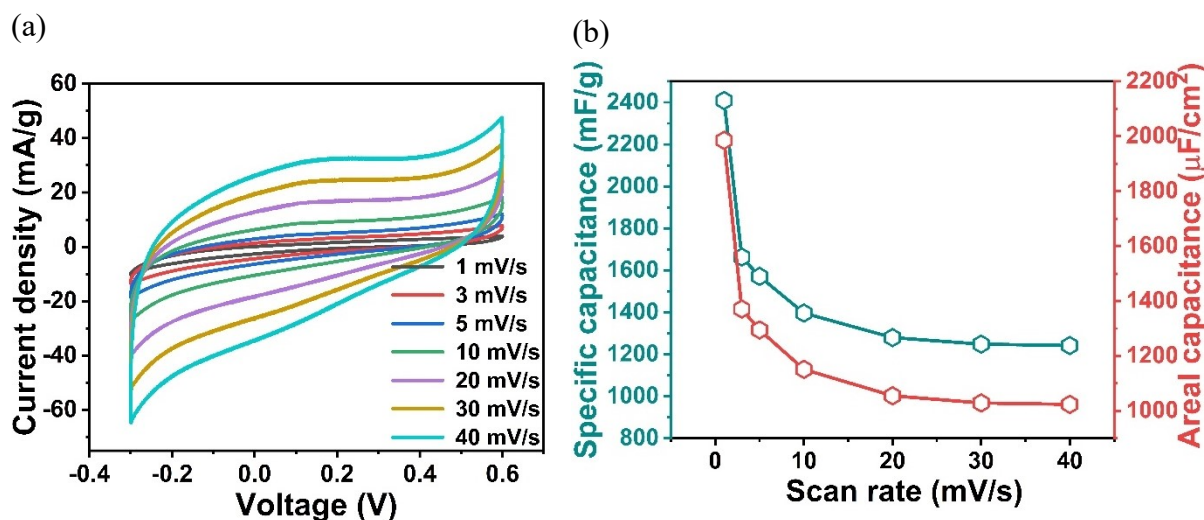

Figure S11. (a) CV curves of the ball-milled  $\text{Ti}_2\text{O}_3$  (annealed at  $300^\circ\text{C}$ ) electrode in three-electrode measurement using 1 M  $\text{H}_3\text{PO}_4$  electrolyte solution. (b) Specific capacitance and areal capacitance are plotted as a function of scan rates.

#### References:

- [1] G. Kresse, J. Furthmüller, Efficiency of ab-initio total energy calculations for metals and semiconductors using a plane-wave basis set, *Comput. Mater. Sci.* 6 (1996) 15–50. [https://doi.org/10.1016/0927-0256\(96\)00008-0](https://doi.org/10.1016/0927-0256(96)00008-0).
- [2] P.E. Blöchl, Projector augmented-wave method, *Phys. Rev. B.* 50 (1994) 17953–17979. <https://doi.org/10.1103/PhysRevB.50.17953>.
- [3] J. Heyd, G.E. Scuseria, M. Ernzerhof, Hybrid functionals based on a screened Coulomb potential, *J. Chem. Phys.* 118 (2003) 8207–8215. <https://doi.org/10.1063/1.1564060>.
